# Supplementary material for: High-affinity neoantigens correlate with better prognosis and trigger potent antihepatocellular carcinoma (HCC) activity by activating CD39+CD8+ T cells
Source: PubMed Central journal article supplement — Gut. 2020 Dec 1;70(10):1965–77. doi: 10.1136/gutjnl-2020-322196 (PMC8458084; doi:10.1136/gutjnl-2020-322196), 2020-12-01
Supplement: gutjnl-2020-322196supp002.pdf [file gutjnl-2020-322196supp002.pdf]

1

## Supplemental Figures and legends

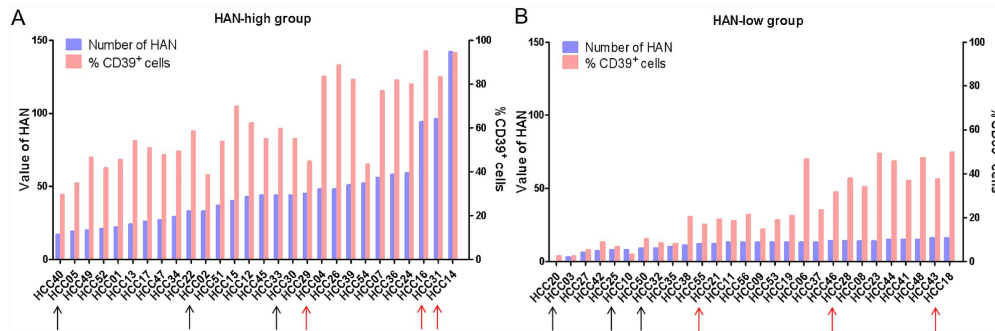

2

## 3 Supplemental Figure 1

4 Summary of the frequency of CD39<sup>+</sup>CD8<sup>+</sup> TILs and value of HAN for all the 56 HCC5 patients. (A-B) Red bars represented the frequency of CD39<sup>+</sup>CD8<sup>+</sup> TILs and blue bars

6 represented the value of HAN. Arrows indicated the six representative patients

7 selected for TILs and autologous tumors organoids killing assay. Red arrows indicated

8 three candidate patients selected for specific high affinity peptide identification assay.

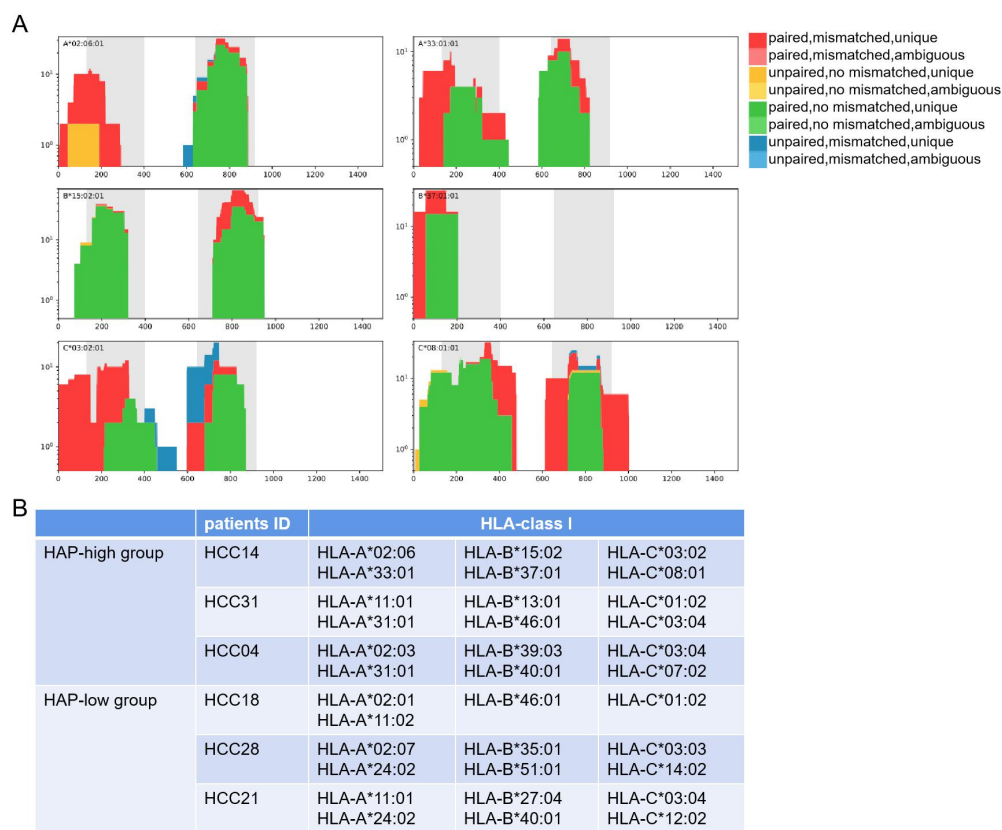

9

10 **Supplemental Figure 2**

11 HLA alleles Analysis by OptiType(v1.3.3) were shown for six candidate patients. (A)

12 The coverage plot of the HLA alleles for representative patient HCC14 analyzed by

13 OptiType were shown. Listed HLA alleles were with high expression abundance.

14 (B) Summary HLA alleles of all the six candidate patients were shown in this table.

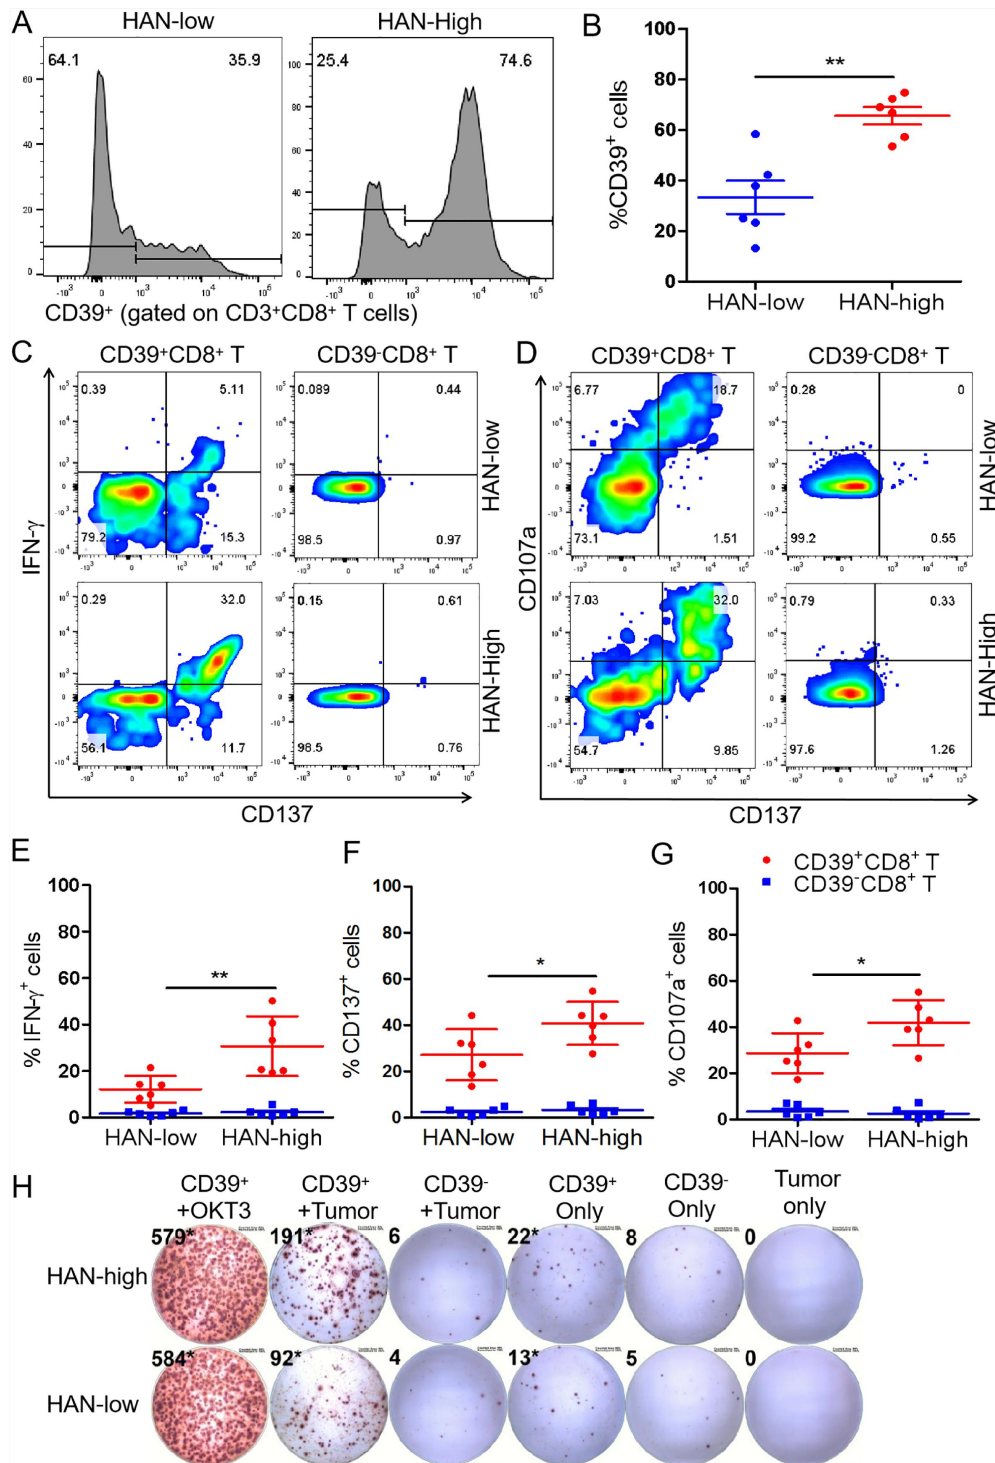

15

16 **Supplemental Figure 3**

17 CD39 and effector molecules expressed on TILs from surgically removed HCC fresh

18 tumor samples. (A-B) The frequency of CD39<sup>+</sup>CD8<sup>+</sup> T cells in each group was  
19 detected by flow cytometry. (C-G)The expression of IFN- $\gamma$ , CD107a and CD137 on  
20 CD39<sup>+</sup>CD8<sup>+</sup> T cells was detected by flow cytometry. The dots represent different  
21 patients. Data are presented as mean  $\pm$  SEM (n=6), \* $P$  < 0.05, \*\* $P$  < 0.01.(H) CD39<sup>+</sup>/  
22 CD8<sup>+</sup> TILs were respectively sorted from surgically removed fresh tumor sample and  
23 co-cultured with or without (TILs only) autologous tumor cells, then the IFN- $\gamma$   
24 secretion was investigated by ELISPOT after 24 hours. OKT3 was used as positive  
25 control.

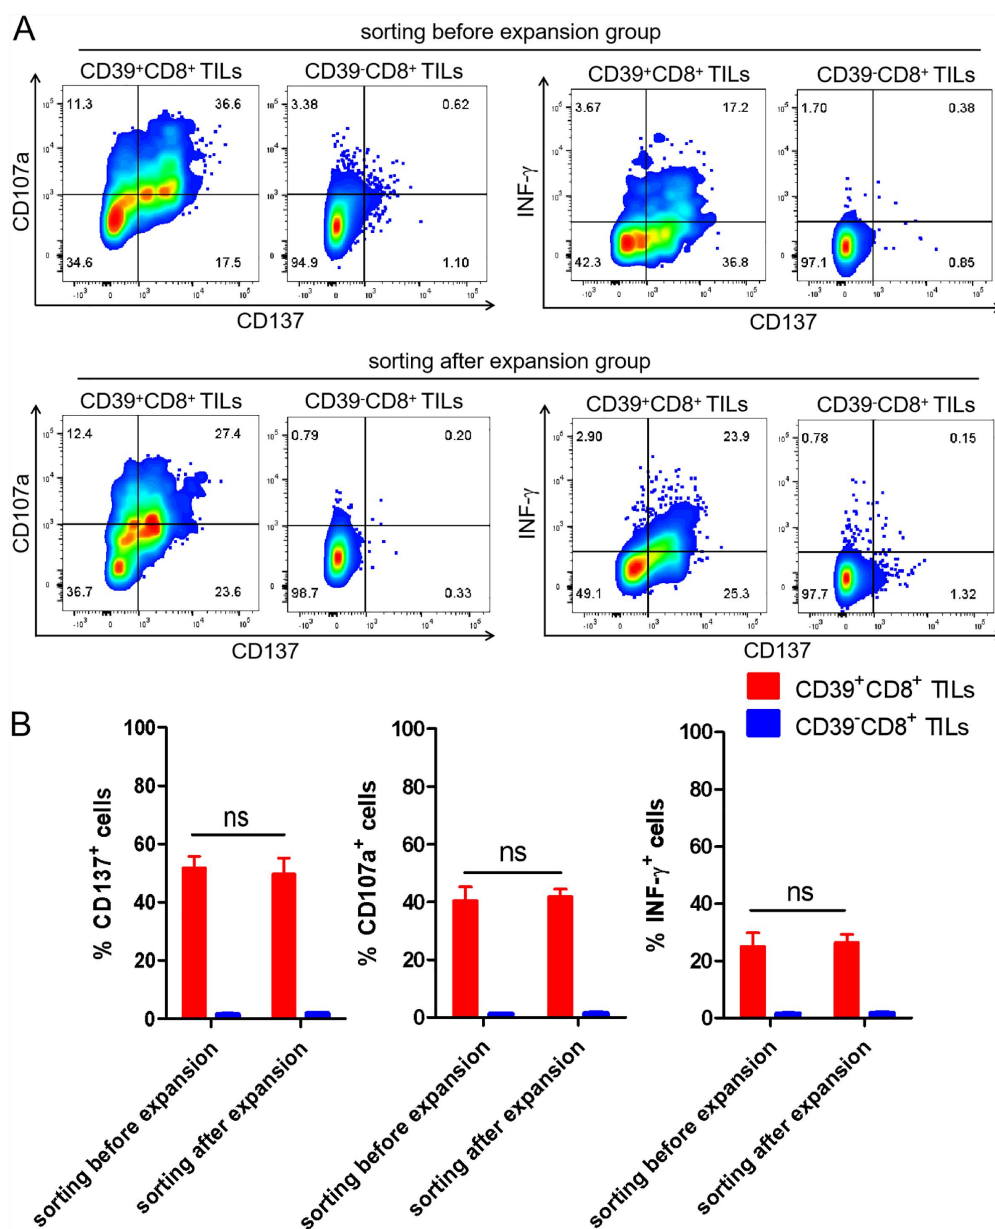

33 one was the sorting after expansion group which TILs were expanded first for 14 days  
 34 and then sorted by the marker of CD39. At day 14, TILs of each group was  
 35 co-cultured with tumor cells, and then the function of CD39<sup>±</sup> subsets was assessed by  
 36 flow cytometry with intracellular staining of IFN- $\gamma$ , CD107a and CD137. (B)  
 37 Summary of the frequency of IFN- $\gamma$ , CD107a and CD137 positive was shown.

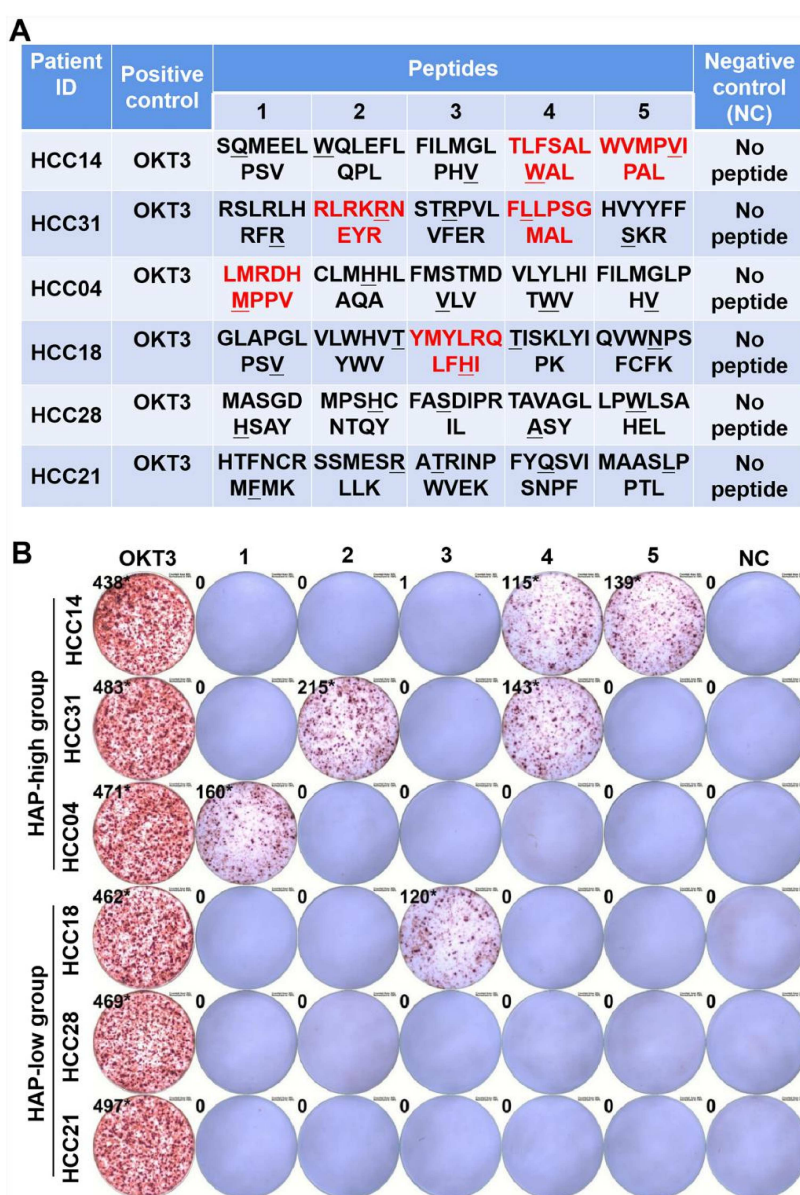

38

39 **Supplemental Figure 5**

40 Identification of personalized neoantigens for 6 patients. (A-B) Autologous PBMCs  
 41 were stimulated with top five candidate peptides for 10 days, after which autologous  
 42 tumor organoid from candidate patient was added to activate T-cell specific antigen  
 43 response 24h before IFN- $\gamma$  detection by ELISPOT assays. OKT3 was used as positive  
 44 control, and no-peptide stimulation was tested as negative control.

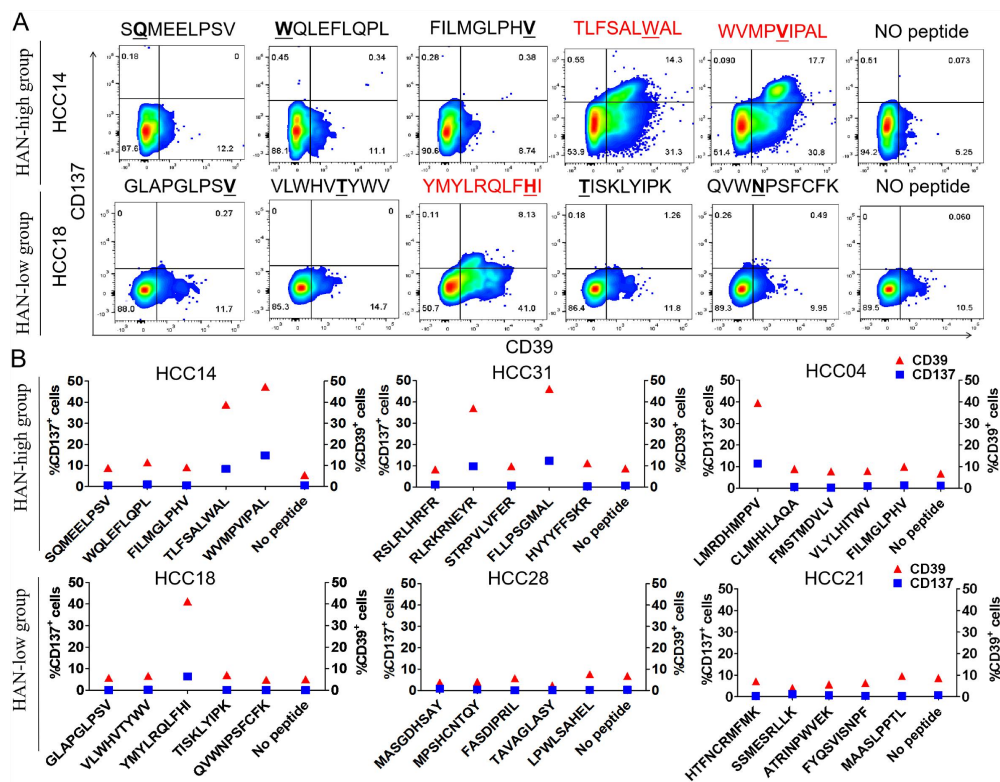45 **Supplemental Figure 6**

46 Expression of CD137 and CD39 of tumor-reactive CD39<sup>+</sup>CD8<sup>+</sup> T cells by stimulation  
 47 with candidate HANs from PBMCs. (A) Flow cytometry plots gated on CD8<sup>+</sup> T cells  
 48 to analyze T cell effector sensitivity against tumor organoids by CD137 and CD39  
 49 up-regulation. (B) Summary of the frequency of CD39<sup>+</sup> or CD137<sup>+</sup> T cells was shown  
 50

51 for all the six representative patients.

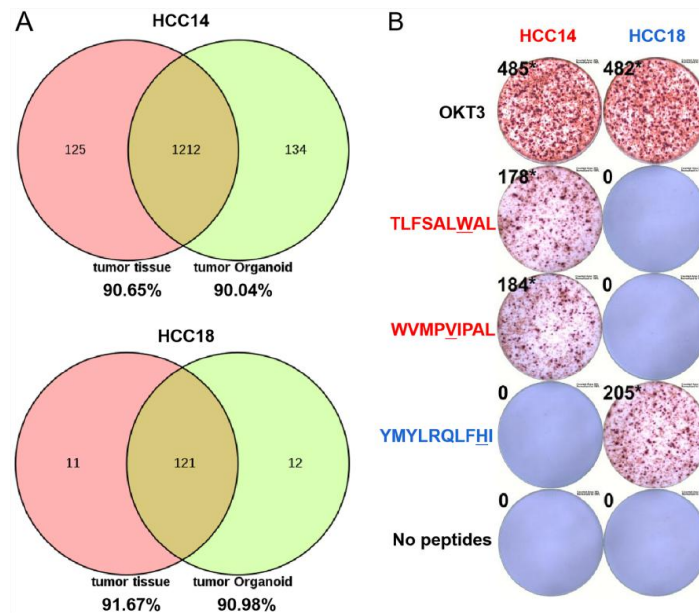

52

### 53 Supplemental Figure 7

54 Allogeneic positive peptides couldn't induce IFN- $\gamma$  release for autologous tumor  
 55 organoid killing. (A) Venn diagrams illustrate the number of somatic non-synonymous  
 56 mutations present in each tumor tissue and their derivative HCC organoids. The  
 57 similarity of mutation from tumor tissue and organoid was greater than 90%. (B)  
 58 Autologous PBMCs from candidate patients were stimulated with autologous peptides  
 59 (marked by the same color) and allogeneic peptides (marked by the different color)  
 60 for 10 days, after which autologous tumor organoids from candidate patient was  
 61 added to activate T-cell specific antigen response 24h before IFN- $\gamma$  detection by  
 62 ELISPOT assays. OKT3 was used as positive control, and no-peptide stimulation was  
 63 tested as negative control.



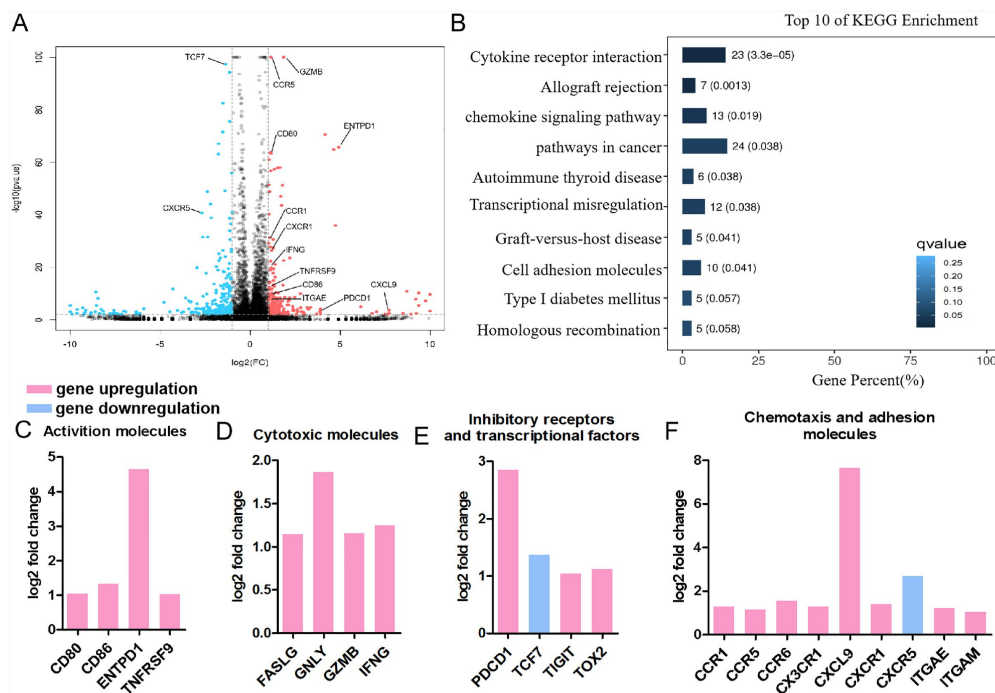

64

65 **Supplemental Figure 8**

66 RNA-seq data of CD39<sup>+</sup>-CD8<sup>+</sup> T cells stimulated by HAN peptide. PBMCs were  
 67 stimulated by autologous HANs for 10 days and then co-cultured with autologous  
 68 tumor organoids for 24h. After which CD39<sup>+</sup>-CD8<sup>+</sup> T cells were sorted by FACS for  
 69 following RNA-seq assay. (A) Volcano graph revealed the difference of genes  
 70 expression analyzed by RNA-seq between CD39<sup>+</sup>-CD8<sup>+</sup> T cells after stimulation by  
 71 HAN peptide (log<sub>2</sub>-transformed). The dashed line identified the differently expressed  
 72 genes when using a P value <0.05. (B) KEGG enrichment demonstrated the  
 73 significant enrichment of top 10 pathways using a P/Q value. (C-F) Bar plots  
 74 indicated the RNA-seq expression of log<sub>2</sub> fold change of major up-regulated and  
 75 down-regulated genes in CD39<sup>+</sup>CD8<sup>+</sup> T cells compared to CD39<sup>-</sup>CD8<sup>+</sup> T cells (P  
 76 <0.05). Pink bars represented up-regulation and blue bars represented  
 77 down-regulation.
